# Supplementary material for: Modulation Effects of Toxoplasma gondii Histone H2A1 on Murine Macrophages and Encapsulation with Polymer as a Vaccine Candidate
Source: Vaccines (Basel). 2020 Dec 3;8(4):731. doi: 10.3390/vaccines8040731 (PMC7761694; doi:10.3390/vaccines8040731)
Supplement: Supplementary file 1 [file vaccines-08-00731-s001.pdf]

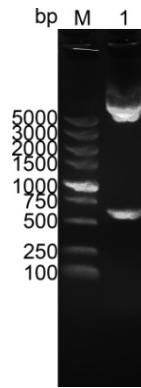

**Figure S1.** Double digestion analysis of the recombinant plasmid pET32a/H2A1. Lane M: DNA molecular weight marker DL5000; Line 1: plasmid pET32a/H2A1 digested by *Eco* RI and *Hind* III.

Download GenBank Graphics

**Toxoplasma gondii ME49 histone H2A1 partial mRNA**  
Sequence ID: [XM\\_002365227.2](#) Length: 1173 Number of Matches: 1

Range 1: 1 to 543 GenBank Graphics Next Match Previous Match

| Score          | Expect                                                     | Identities    | Gaps      | Strand    |
|----------------|------------------------------------------------------------|---------------|-----------|-----------|
| 1003 bits(543) | 0.0                                                        | 543/543(100%) | 0/543(0%) | Plus/Plus |
| Query 1        | ATGTGGTTGTGOGATTGGGCAAGGAAACCAAGTATCATTTCTGACTCTTACAAAATT  | 60            |           |           |
| Sbjct 1        | ATGTGGTTGTGOGATTGGGCAAGGAAACCAAGTATCATTTCTGACTCTTACAAAATT  | 60            |           |           |
| Query 61       | TCCGGGGCAATACACACACGCTTTTCTTACACAGGCTGCTTCTTCTTCTGTTTTTTT  | 120           |           |           |
| Sbjct 61       | TCCGGGGCAATACACACACGCTTTTCTTACACAGGCTGCTTCTTCTTCTGTTTTTTT  | 120           |           |           |
| Query 121      | GGTTCTTCTTCTTCTTCTTCTTCTTCTTCTTCTTCTTCTTCTTCTTCTTCTTCTT    | 180           |           |           |
| Sbjct 121      | GGTTCTTCTTCTTCTTCTTCTTCTTCTTCTTCTTCTTCTTCTTCTTCTTCTTCTT    | 180           |           |           |
| Query 181      | CGCGCAAGCAAGTCCGGCAAGAGCAGCAGCAAGTCTGCCAAGGCGGCTTTCAGTTCC  | 240           |           |           |
| Sbjct 181      | CGCGCAAGCAAGTCCGGCAAGAGCAGCAGCAAGTCTGCCAAGGCGGCTTTCAGTTCC  | 240           |           |           |
| Query 241      | GTGGCAAGCAAGTCCGGCAAGAGCAGCAGCAAGTCTGCCAAGGCGGCTTTCAGTTCC  | 300           |           |           |
| Sbjct 241      | GTGGCAAGCAAGTCCGGCAAGAGCAGCAGCAAGTCTGCCAAGGCGGCTTTCAGTTCC  | 300           |           |           |
| Query 301      | GGCGCAAGCAAGTCCGGCAAGAGCAGCAGCAAGTCTGCCAAGGCGGCTTTCAGTTCC  | 360           |           |           |
| Sbjct 301      | GGCGCAAGCAAGTCCGGCAAGAGCAGCAGCAAGTCTGCCAAGGCGGCTTTCAGTTCC  | 360           |           |           |
| Query 361      | GGCAAGCAAGTCCGGCAAGAGCAGCAGCAAGTCTGCCAAGGCGGCTTTCAGTTCC    | 420           |           |           |
| Sbjct 361      | GGCAAGCAAGTCCGGCAAGAGCAGCAGCAAGTCTGCCAAGGCGGCTTTCAGTTCC    | 420           |           |           |
| Query 421      | GTCCGCAAGCAAGTCCGGCAAGAGCAGCAGCAAGTCTGCCAAGGCGGCTTTCAGTTCC | 480           |           |           |
| Sbjct 421      | GTCCGCAAGCAAGTCCGGCAAGAGCAGCAGCAAGTCTGCCAAGGCGGCTTTCAGTTCC | 480           |           |           |
| Query 481      | GTCATGCTTAAAGTCCAGTCTGTGCTCTTCTTCTTCTTCTTCTTCTTCTTCTTCTT   | 540           |           |           |
| Sbjct 481      | GTCATGCTTAAAGTCCAGTCTGTGCTCTTCTTCTTCTTCTTCTTCTTCTTCTTCTT   | 540           |           |           |
| Query 541      | TAA                                                        | 543           |           |           |
| Sbjct 541      | TAA                                                        | 543           |           |           |

**Figure S2.** Sequence alignment results of the recombinant plasmid pET32a/H2A1. Compared with the nucleotide sequences of H2A1 gene (Genbank: XM\_002365227), sequence analysis was conducted through the Blast program online (<http://www.blast.ncbi.nlm.nih.gov/blast.cgi>).

**Table S1.** Effects on proliferation at different concentrations (0, 5, 10, 20, 40, 80 µg/ml) of rTgH2A1 on the murine macrophages. Results were evaluated using one-way ANOVA analysis followed by Dunnett's test and shown as mean of the OD450 ± standard deviation.

| Group            | OD value      | P value <sup>a</sup> | P value <sup>b</sup> |
|------------------|---------------|----------------------|----------------------|
| Blank            | 0.401 ± 0.016 | -                    | 0.9980               |
| Control          | 0.408 ± 0.018 | 0.9980               | -                    |
| 5 µg/mL rTgH2A1  | 0.391 ± 0.015 | 0.9892               | 0.8892               |
| 10 µg/mL rTgH2A1 | 0.402 ± 0.017 | > 0.9999             | 0.9982               |
| 20 µg/mL rTgH2A1 | 0.446 ± 0.019 | 0.1614               | 0.2857               |
| 40 µg/mL rTgH2A1 | 0.474 ± 0.030 | 0.0111               | 0.0218               |
| 80 µg/mL rTgH2A1 | 0.367 ± 0.017 | 0.3665               | 0.2134               |

<sup>a</sup> and <sup>b</sup> were compared with blank group and His tagged protein group, respectively.
